# Supplementary material
Source: publisher figshare collection journal article supplement (https://springernature.figshare.com/ndownloader/files/16447346)
Supplement: Supplementary file [file 16447346]

|                                   |                                    | IGR with altered nuc.<br>in <i>scc1-73</i><br>(286) | IGR with up nuc.<br>in <i>scc1-73</i><br>(129) | IGR with down nuc.<br>in <i>scc1-73</i><br>(151) |
|-----------------------------------|------------------------------------|-----------------------------------------------------|------------------------------------------------|--------------------------------------------------|
| <b>Scc1-binding IGR</b><br>(1720) | <i>overlap.</i>                    | 84                                                  | 32                                             | 50                                               |
|                                   | <i>obs/exp</i><br>( <i>p-val</i> ) | 1.12<br>(0.02)                                      | 0.96<br>(0.08)                                 | 1.27<br>(0.01)                                   |
|                                   |                                    | ORF with altered nuc.<br>in <i>scc1-73</i><br>(358) | ORF with up nuc.<br>in <i>scc1-73</i><br>(157) | ORF with down nuc.<br>in <i>scc1-73</i><br>(206) |
| <b>Scc1-binding ORF</b><br>(2363) | <i>overlap.</i>                    | 167                                                 | 80                                             | 91                                               |
|                                   | <i>obs/exp</i><br>( <i>p-val</i> ) | 1.14<br>(0.03)                                      | 1.24<br>(0.002)                                | 1.07<br>(0.03)                                   |

**Table S6.** The effect of cohesin inactivation on chromatin structure is more severe in cohesin-associated regions. The probability that *scc1-73* alters nucleosomes in Scc1-binding IGR or Scc1-binding ORF if the altered genomic regions in *scc1-73* cells were randomly distributed was determined by a hypergeometric test. The rate between the observed and expected frequencies of common genomic regions is also shown. The number of regions in each case is indicated in parenthesis.
